# Supplementary material for: Crizotinib and PARP inhibitors act synergistically by triggering apoptosis in high-grade serous ovarian cancer
Source: PubMed Central journal article supplement (PMC6916751; doi:10.18632/oncotarget.27363), 2019-12-10
Supplement: oncotarget-10-6981-s001.pdf [file oncotarget-10-6981-s001.pdf]

# Crizotinib and PARP inhibitors act synergistically by triggering apoptosis in high-grade serous ovarian cancer

## SUPPLEMENTARY MATERIALS

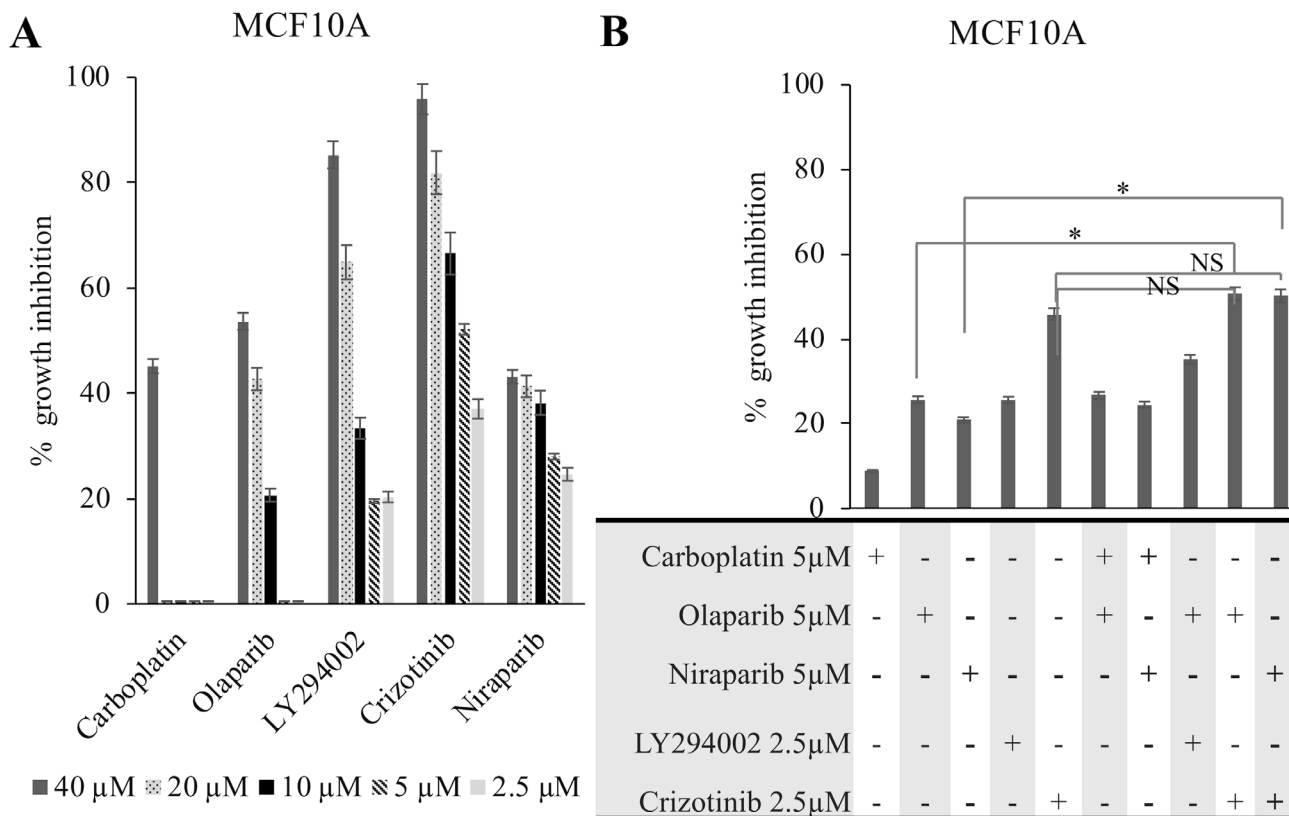

**Supplementary Figure 1:** Growth inhibitory effects of (A) single agent and (B) combination regimens on non-tumorigenic breast epithelial cells. MCF10A cells were treated with single agents or sequential regimens for 1 week and growth inhibitory effects were measured by the NCI-SRB assay. All experiments were conducted in triplicates. Statistical analysis of mean values ( $n = 3$ ) was performed with student's  $t$ -test ( $*p < 0.05$ ;  $**p < 0.01$ ;  $***p < 0.005$ ; NS, not significant).

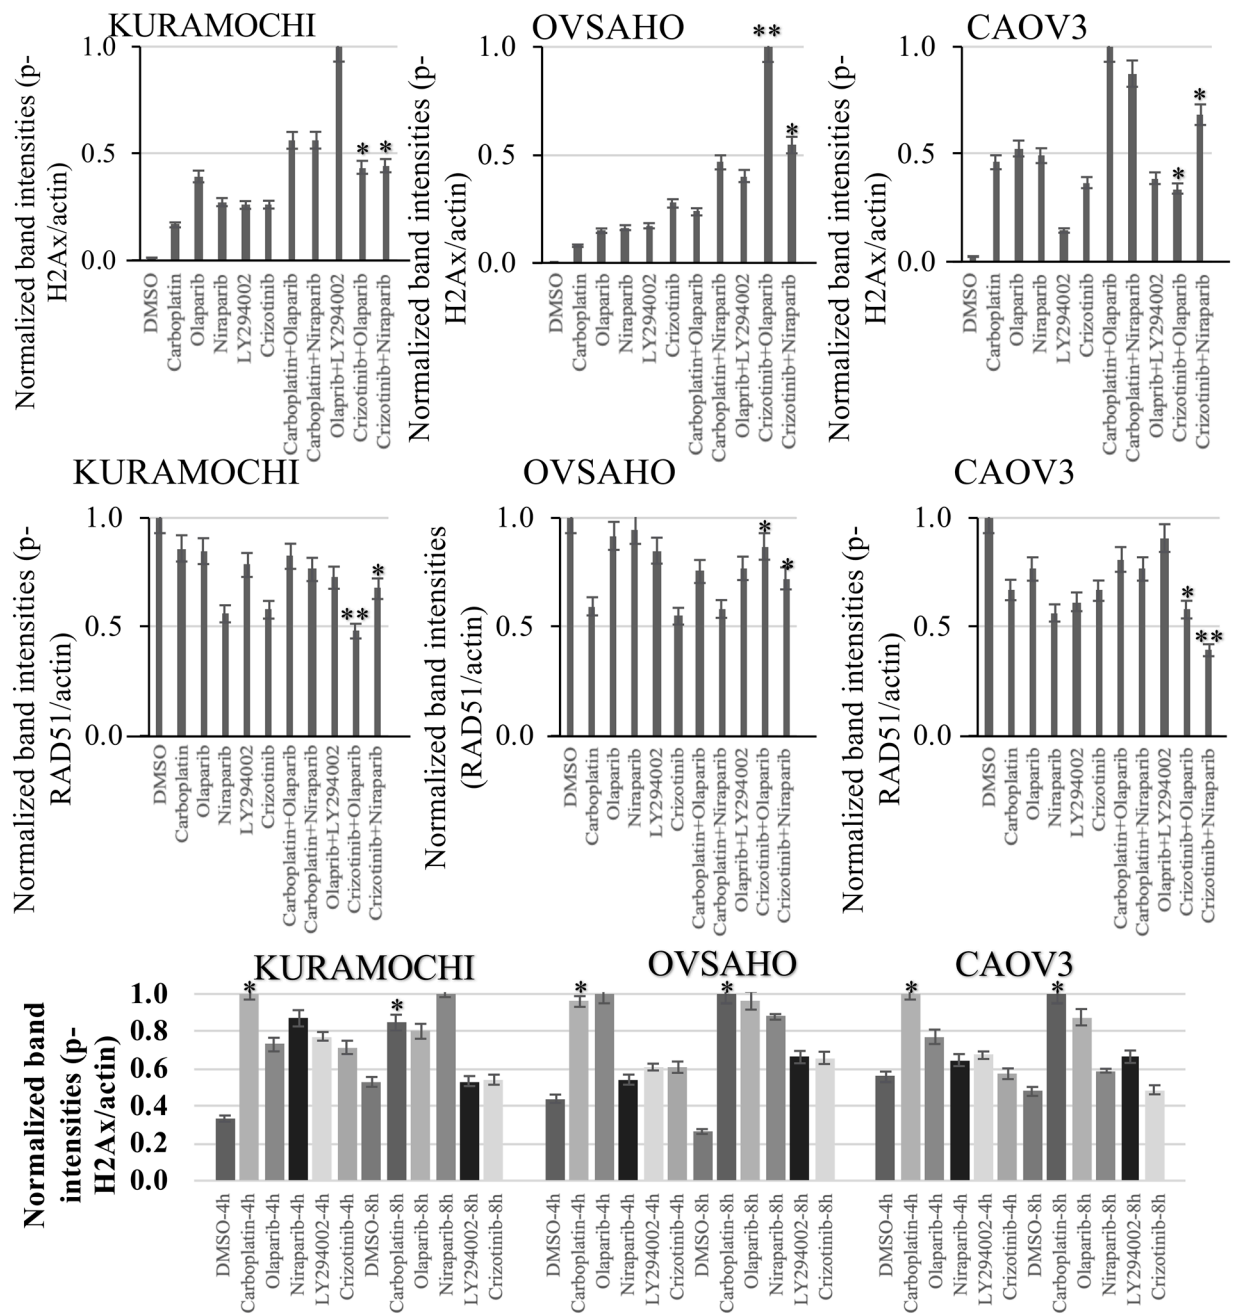

**Supplementary Figure 2: Quantification of Western blot analysis of  $\gamma$ H2AX and RAD51.** Cells treated with single agents or sequential regimens for 1 week (concentrations indicated in bold in Table 3). Quantification of the images was performed with ImageJ software. (\* $p < 0.05$ ; \*\* $p < 0.01$ ; \*\*\* $p < 0.005$ ).

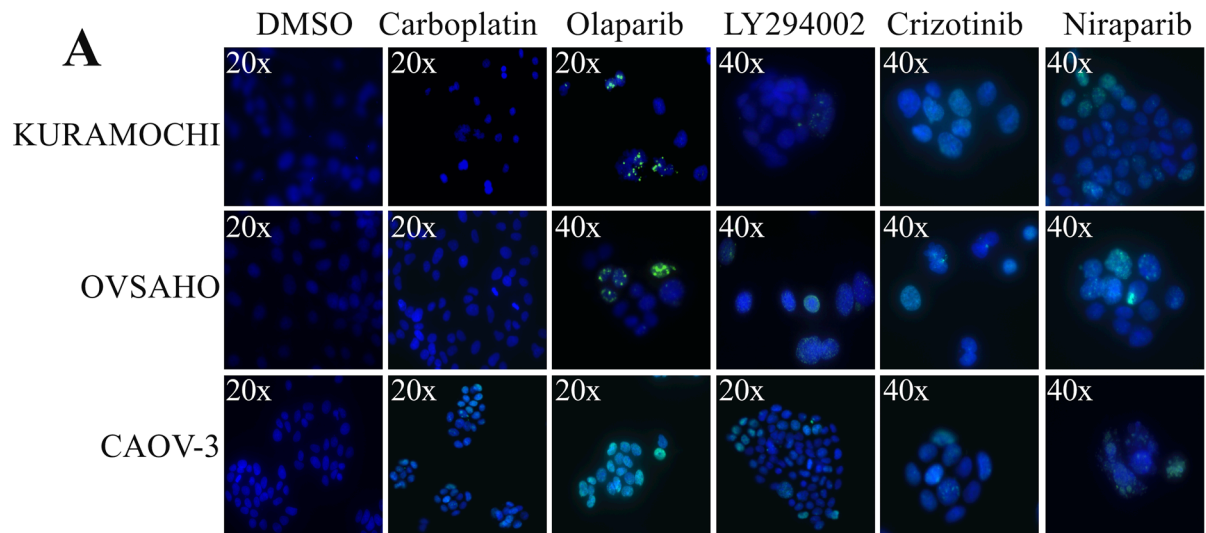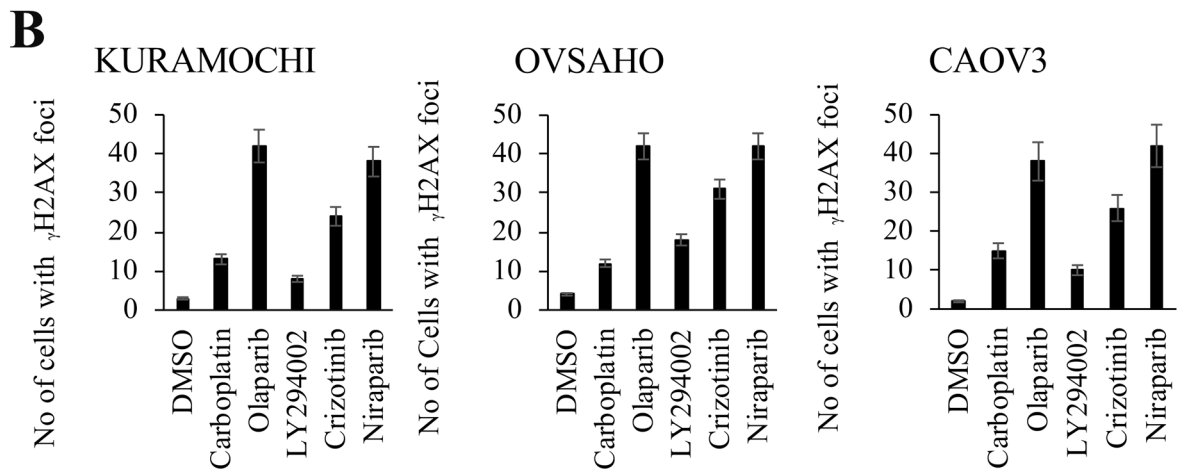

**Supplementary Figure 3: Immunofluorescence staining of  $\gamma$ H2AX.** (A) Cells treated with single agents for 72 h (concentrations indicated in bold in Table 3) were analyzed by immunofluorescence staining of  $\gamma$ H2AX (green). DAPI (blue) was used to visualize nuclei. DMSO was used as a negative control. (B) The bar graphs represent the quantification of  $\gamma$ H2AX fluorescence intensity averaged from >50 nuclei processed by ImageJ.

## KURAMOCHI

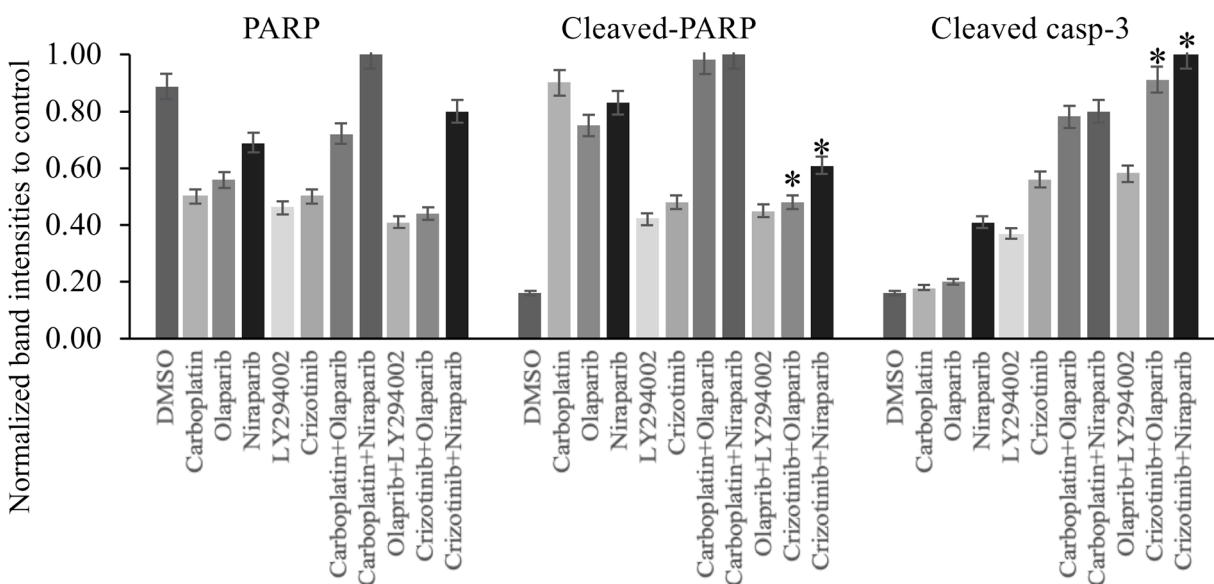

## OVSAHO

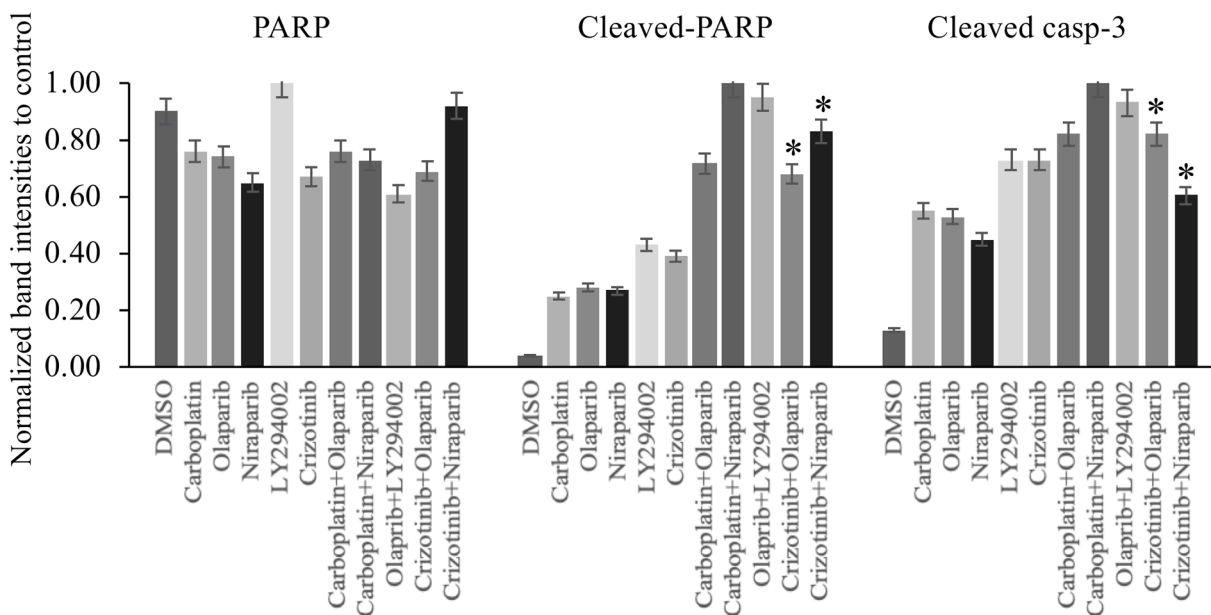

**Supplementary Figure 4: Effects on cell death pathways.** Assessment of effects on PARP, cleaved PARP and cleaved caspase 3 proteins after 1 week of single agent or sequential combination treatments of KURAMOCHI and OVSAHO cell lines. Quantification of the Western blot images with ImageJ ( $p < 0.05$ ;  $**p < 0.01$ ;  $***p < 0.005$  significance values calculated compared to DMSO controls using ANOVA followed by Tukey's test).

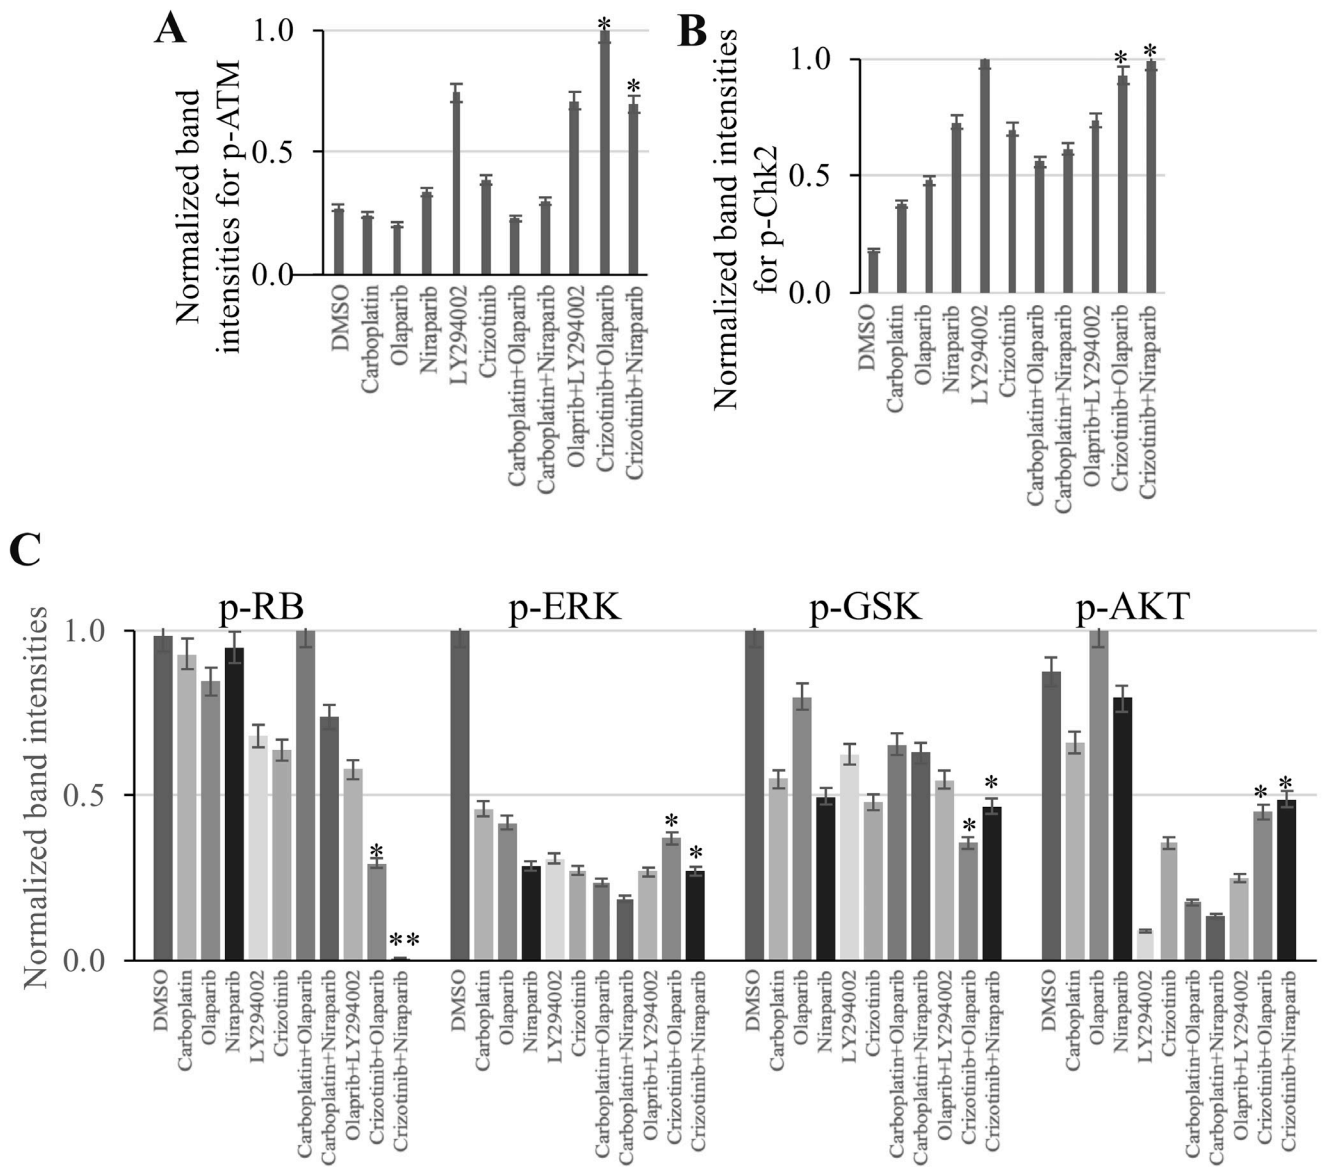

**Supplementary Figure 5: Effects on cellular and molecular pathways.** Investigation of effects of the drugs on (A) ATM, (B) Chk2, (C) (Rb, Erk, GSK and AKT) pathways after 1 week treatment of KURAMOCHI cell line. Quantification of Western blot images performed with ImageJ software (p-protein/control)/(total-protein/control). (\* $p < 0.05$ ; \*\* $p < 0.01$ ; \*\*\* $p < 0.005$  significance values were compared to DMSO control).

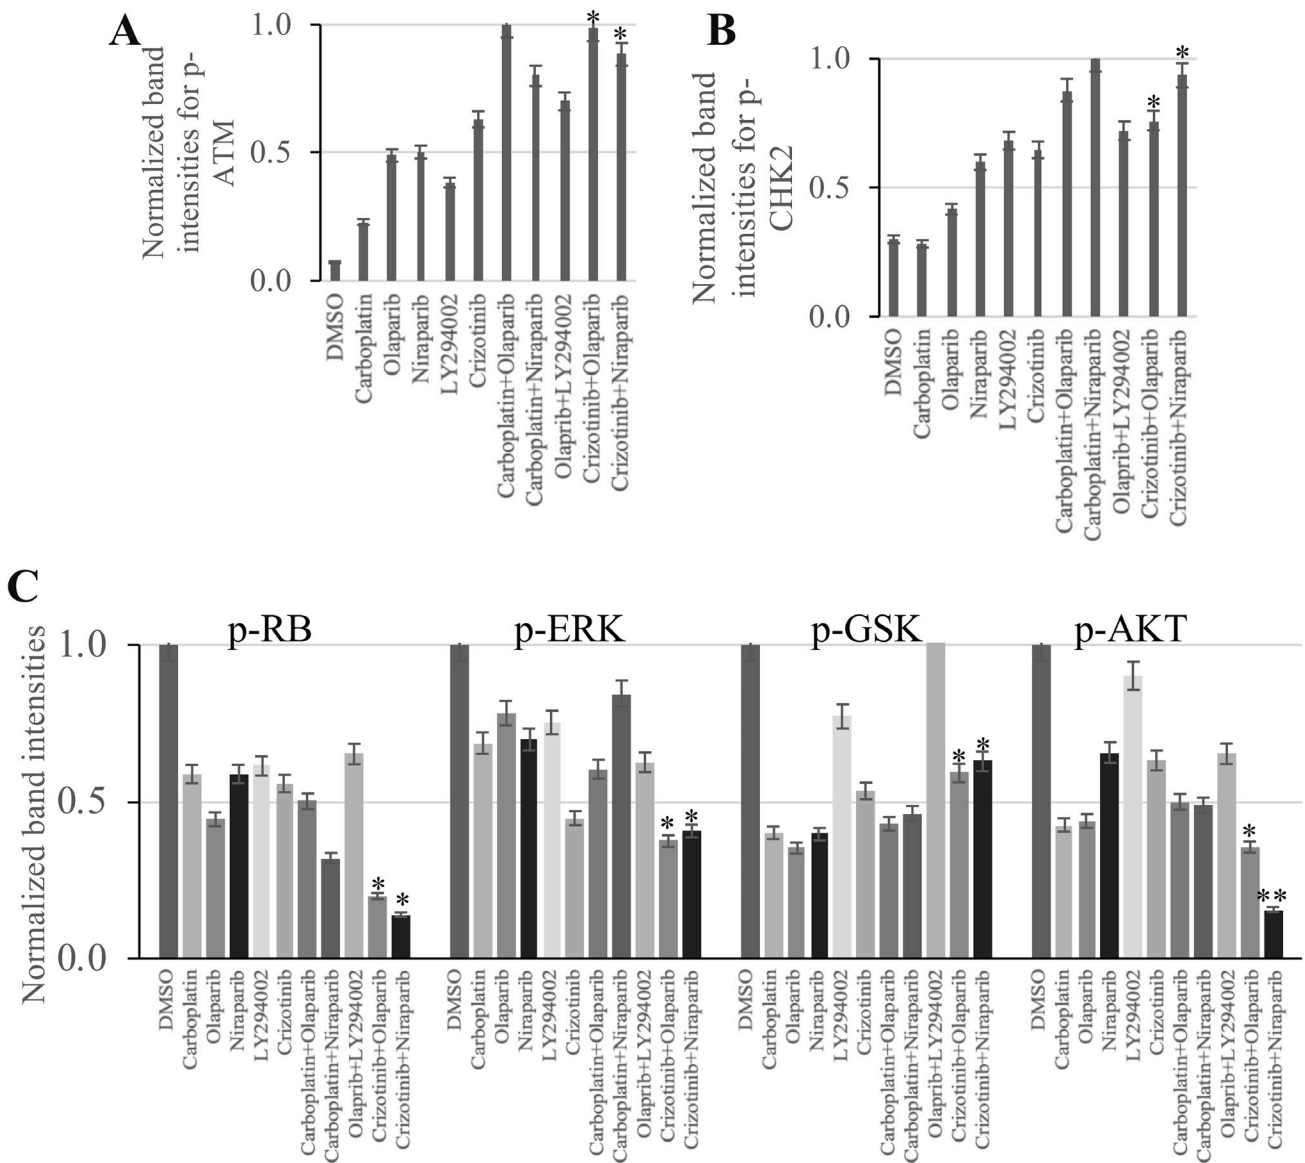

**Supplementary Figure 6: Effects on cellular and molecular pathways.** Investigation of effects of the drugs on (A) ATM, (B) Chk2, (C) (Rb, Erk, GSK and AKT) pathways after 1 week treatment of OVSAHO cell line. Quantification of Western blot images performed with ImageJ software (p-protein/control)/(total-protein/control). (\* $p < 0.05$ ; \*\* $p < 0.01$ ; \*\*\* $p < 0.005$  significance values were compared to DMSO control).

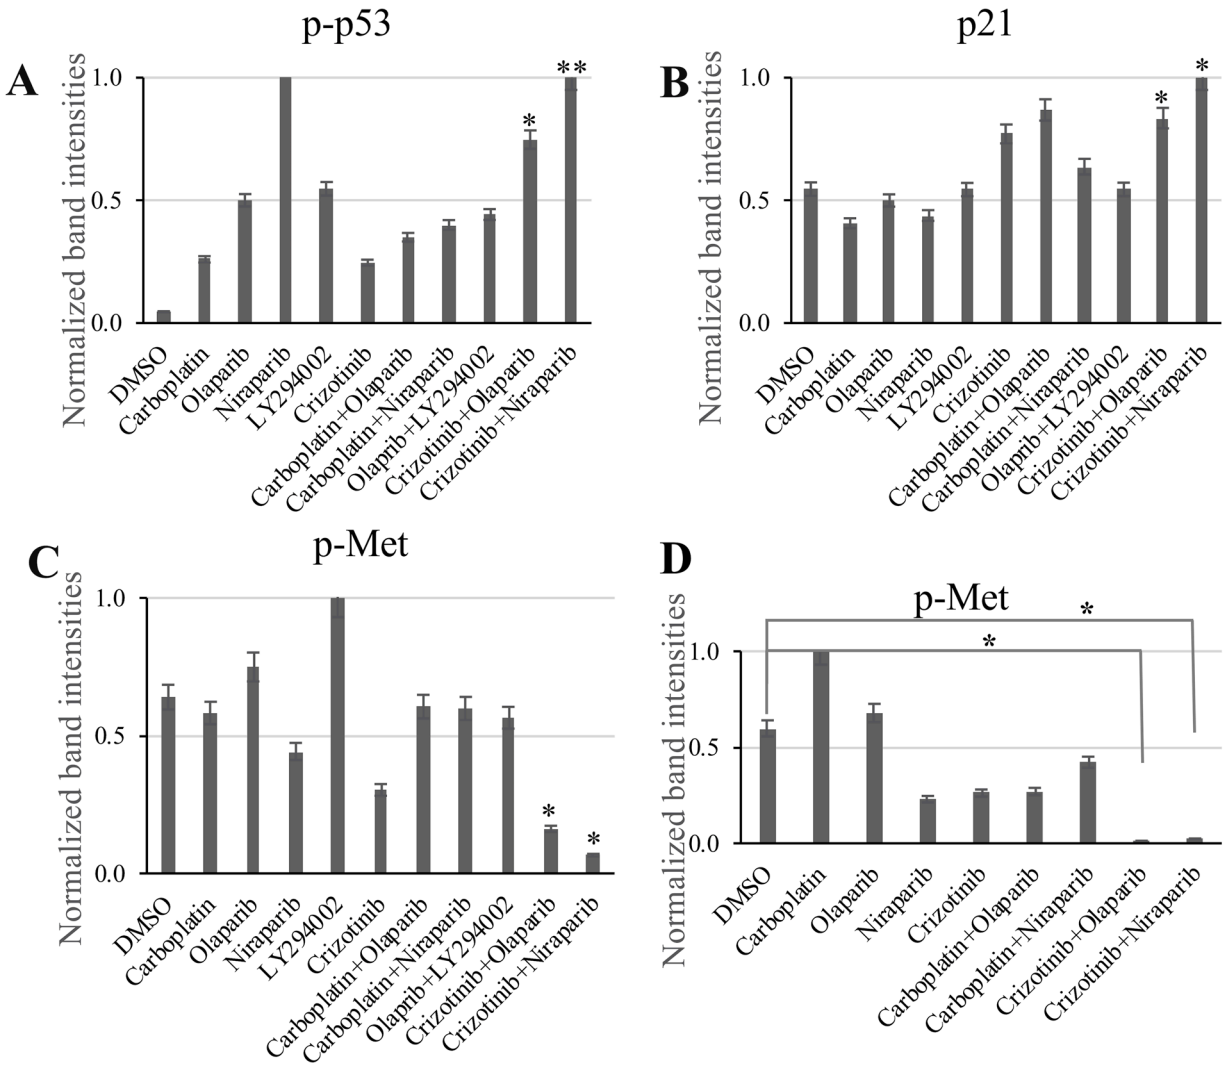

**Supplementary Figure 7: Effects on cellular and molecular pathways.** Investigation of effects of the drugs on (A) p53, (B) p21 and (C) c-Met pathways on cancer cell lines and (D) an *ex vivo* patient sample after 1 week of treatment. Quantification of Western blot images performed with ImageJ software (p-protein/control)/(total-protein/control) (or for p21: (protein/control)). (\* $p < 0.05$ ; \*\* $p < 0.01$ ; \*\*\* $p < 0.005$  significance values were compared to DMSO control).
